# Supplementary material for: Design and Functionalization of a µPAD for the Enzymatic Determination of Nitrate in Urine
Source: MDPI journal article supplement (doi:10.3390/molecules26216355), 2021-10-21
Supplement: s1 [file s1]

## Electronic Supplementary Information

### Design and functionalization of a $\mu$ PAD for enzymatic determination of nitrate ions in urine

Francisca T. S. M. Ferreira, Raquel B. R. Mesquita, António O. S. S. Rangel

*Universidade Católica Portuguesa, CBQF - Centro de Biotecnologia e Química Fina – Laboratório Associado, Escola Superior de Biotecnologia, Rua Diogo Botelho 1327, 4169-005, Porto, Portugal*

**Table S1.** Description of the different parameters tested under each condition and the resulting absorbance signal: 100  $\mu$ L of a nitrate standard of 12 mM (1.2  $\mu$ mol); concentration of NADPH, 2 mM; concentration of NR, 0.4 U/mL.

| Condition ID | NADPH           |           | NR              |      | A     |
|--------------|-----------------|-----------|-----------------|------|-------|
|              | Vol. ( $\mu$ L) | $\mu$ mol | Vol. ( $\mu$ L) | U    |       |
| 1A           | 100             | 0.2       | 100             | 0.04 | 0.572 |
| 2A           | 50              | 0.1       | 100             | 0.04 | 0.626 |
| 3A           | 100             | 0.2       | 50              | 0.02 | 0.238 |
| 4A           | 50              | 0.1       | 50              | 0.02 | 0.238 |
| 5A           | 50              | 0.1       | 150             | 0.06 | 0.634 |
| 6A           | 50              | 0.1       | 200             | 0.08 | 0.742 |

**Table S2.** Description of the different parameters tested under each condition and the resulting absorbance signal: 100  $\mu$ L of a nitrate standard of 1.2 mM (0.12  $\mu$ mol); concentration of NADPH, 0.2 mM; concentration of NR, 0.4 U/mL.

| Condition ID | NADPH           |           | NR              |      | A     |
|--------------|-----------------|-----------|-----------------|------|-------|
|              | Vol. ( $\mu$ L) | $\mu$ mol | Vol. ( $\mu$ L) | U    |       |
| 1B           | 50              | 0.01      | 100             | 0.04 | 0.101 |
| 2B           | 50              | 0.01      | 150             | 0.06 | 0.097 |
| 3B           | 50              | 0.01      | 200             | 0.08 | 0.091 |
| 4B           | 100             | 0.02      | 100             | 0.04 | 0.181 |
| 5B           | 150             | 0.03      | 100             | 0.04 | 0.275 |
| 6B           | 200             | 0.04      | 100             | 0.04 | 0.292 |
| 7B           | 150             | 0.03      | 150             | 0.06 | 0.270 |
| 8B           | 150             | 0.03      | 200             | 0.08 | 0.278 |

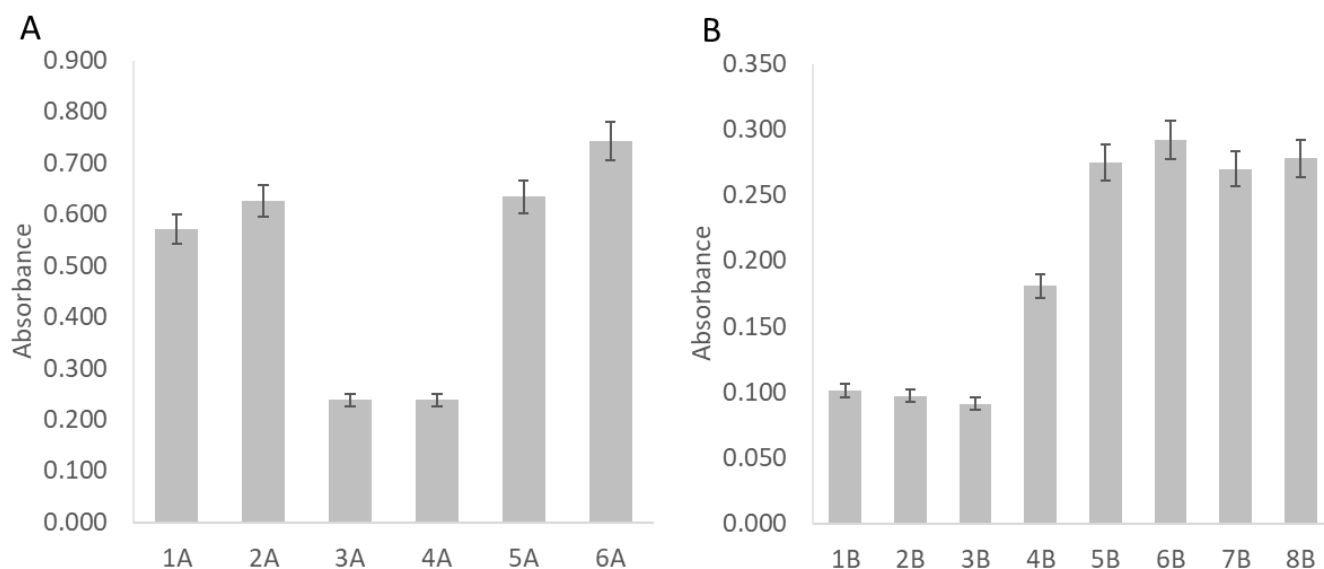

**Figure S1.** Plot of the studied conditions in ESI Table1 and Table S2 with: A) a 12 mM nitrate standard; and B) a 1.2 mM nitrate standard; the error bars represent 5% relative deviation.

**Table S3.** Summary of some properties of Whatman Filter Papers used

| <i>Treatment</i>        | <i>Paper</i> | <i>Particle Retention (<math>\mu\text{m}</math>)</i> |
|-------------------------|--------------|------------------------------------------------------|
| <i>Qualitative</i>      | 1            | 11                                                   |
|                         | 4            | 20-25                                                |
| <i>Hardened Ashless</i> | 541          | 20-25                                                |

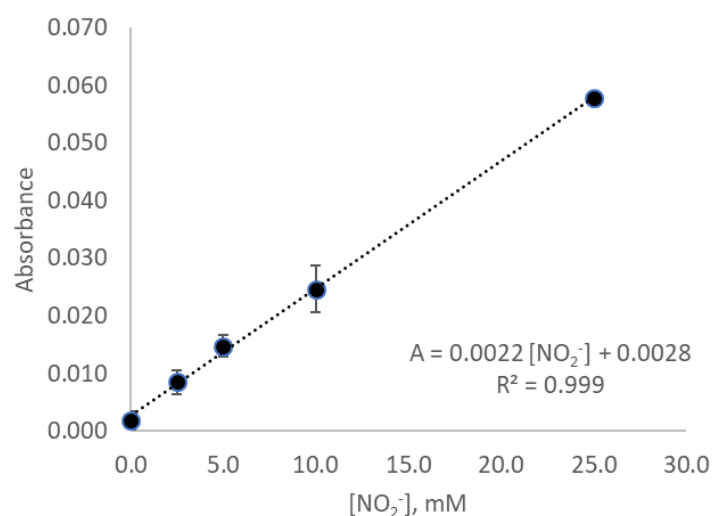

**Figure S2.** Nitrite calibration curve; the error bars represent the standard deviation.
